# Supplementary material for: The micro RNA hsa-miR-377-3p inhibits tumor growth in malignant melanoma
Source: Royal Society of Chemistry journal article supplement (doi:10.1039/c9ra02816a), 2019-01-01
Supplement: c9ra02816a1.pdf [file c9ra02816a1.pdf]

**Supplementary table 1.** All putative miRNAs related to melanoma in MNDR v2.0 database.

| ncRNA Symbol     | ncRNA Category | Species      | Disease Name | Score  |
|------------------|----------------|--------------|--------------|--------|
| *hsa-miR-148b-3p | miRNA          | Homo sapiens | melanoma     | 0.9578 |
| *hsa-miR-377-3p  | miRNA          | Homo sapiens | melanoma     | 0.9443 |
| hsa-miR-224-5p   | miRNA          | Homo sapiens | melanoma     | 0.8965 |
| hsa-miR-128-3p   | miRNA          | Homo sapiens | melanoma     | 0.8965 |
| hsa-miR-135a-5p  | miRNA          | Homo sapiens | melanoma     | 0.8965 |
| hsa-let-7e       | miRNA          | Homo sapiens | melanoma     | 0.8939 |
| hsa-let-7g       | miRNA          | Homo sapiens | melanoma     | 0.8939 |
| *hsa-let-7a-5p   | miRNA          | Homo sapiens | melanoma     | 0.8939 |
| hsa-miR-15a-5p   | miRNA          | Homo sapiens | melanoma     | 0.8939 |
| hsa-miR-27a-3p   | miRNA          | Homo sapiens | melanoma     | 0.8939 |
| hsa-miR-95-3p    | miRNA          | Homo sapiens | melanoma     | 0.8939 |
| hsa-miR-100-5p   | miRNA          | Homo sapiens | melanoma     | 0.8939 |
| hsa-miR-29b-3p   | miRNA          | Homo sapiens | melanoma     | 0.8939 |
| hsa-miR-148a-3p  | miRNA          | Homo sapiens | melanoma     | 0.8939 |
| hsa-miR-139-5p   | miRNA          | Homo sapiens | melanoma     | 0.8939 |
| hsa-miR-34a-5p   | miRNA          | Homo sapiens | melanoma     | 0.8939 |
| hsa-miR-181a-5p  | miRNA          | Homo sapiens | melanoma     | 0.8939 |
| hsa-miR-183-5p   | miRNA          | Homo sapiens | melanoma     | 0.8939 |
| hsa-miR-199b-5p  | miRNA          | Homo sapiens | melanoma     | 0.8939 |
| hsa-miR-181a-3p  | miRNA          | Homo sapiens | melanoma     | 0.8939 |
| hsa-miR-215-5p   | miRNA          | Homo sapiens | melanoma     | 0.8939 |
| *hsa-miR-222-3p  | miRNA          | Homo sapiens | melanoma     | 0.8939 |

|                  |       |              |          |        |
|------------------|-------|--------------|----------|--------|
| hsa-miR-200b-3p  | miRNA | Homo sapiens | melanoma | 0.8939 |
| hsa-miR-27b-3p   | miRNA | Homo sapiens | melanoma | 0.8939 |
| *hsa-miR-125b-5p | miRNA | Homo sapiens | melanoma | 0.8939 |
| hsa-miR-137      | miRNA | Homo sapiens | melanoma | 0.8939 |
| hsa-miR-140-5p   | miRNA | Homo sapiens | melanoma | 0.8939 |
| hsa-miR-141-3p   | miRNA | Homo sapiens | melanoma | 0.8939 |
| hsa-miR-127-3p   | miRNA | Homo sapiens | melanoma | 0.8939 |
| hsa-miR-190a-5p  | miRNA | Homo sapiens | melanoma | 0.8939 |
| hsa-miR-200c-3p  | miRNA | Homo sapiens | melanoma | 0.8939 |
| hsa-miR-200a-3p  | miRNA | Homo sapiens | melanoma | 0.8939 |
| hsa-miR-34c-5p   | miRNA | Homo sapiens | melanoma | 0.8939 |
| hsa-miR-324-5p   | miRNA | Homo sapiens | melanoma | 0.8939 |
| hsa-miR-95-5p    | miRNA | Homo sapiens | melanoma | 0.8939 |
| hsa-miR-215-3p   | miRNA | Homo sapiens | melanoma | 0.8939 |
| hsa-let-7d       | miRNA | Homo sapiens | melanoma | 0.8808 |
| hsa-mir-26a-1    | miRNA | Homo sapiens | melanoma | 0.8808 |
| hsa-mir-104      | miRNA | Homo sapiens | melanoma | 0.8808 |
| hsa-mir-196a-1   | miRNA | Homo sapiens | melanoma | 0.8808 |
| hsa-mir-196a-2   | miRNA | Homo sapiens | melanoma | 0.8808 |
| hsa-mir-203      | miRNA | Homo sapiens | melanoma | 0.8808 |
| hsa-mir-9-2      | miRNA | Homo sapiens | melanoma | 0.8808 |
| hsa-mir-9-3      | miRNA | Homo sapiens | melanoma | 0.8808 |
| hsa-mir-128-2    | miRNA | Homo sapiens | melanoma | 0.8808 |
| hsa-mir-26a-2    | miRNA | Homo sapiens | melanoma | 0.8808 |

|                 |       |              |          |        |
|-----------------|-------|--------------|----------|--------|
| hsa-miR-17-3p   | miRNA | Homo sapiens | melanoma | 0.8808 |
| hsa-miR-19a-3p  | miRNA | Homo sapiens | melanoma | 0.8808 |
| hsa-miR-24-1-5p | miRNA | Homo sapiens | melanoma | 0.8808 |
| hsa-miR-28-5p   | miRNA | Homo sapiens | melanoma | 0.8808 |
| hsa-miR-31-5p   | miRNA | Homo sapiens | melanoma | 0.8808 |
| hsa-miR-96-5p   | miRNA | Homo sapiens | melanoma | 0.8808 |
| hsa-miR-105-5p  | miRNA | Homo sapiens | melanoma | 0.8808 |
| hsa-miR-106a-5p | miRNA | Homo sapiens | melanoma | 0.8808 |
| hsa-miR-107     | miRNA | Homo sapiens | melanoma | 0.8808 |
| hsa-miR-199a-5p | miRNA | Homo sapiens | melanoma | 0.8808 |
| hsa-miR-129-5p  | miRNA | Homo sapiens | melanoma | 0.8808 |
| hsa-miR-182-5p  | miRNA | Homo sapiens | melanoma | 0.8808 |
| hsa-miR-204-5p  | miRNA | Homo sapiens | melanoma | 0.8808 |
| hsa-miR-211-5p  | miRNA | Homo sapiens | melanoma | 0.8808 |
| hsa-miR-216a-5p | miRNA | Homo sapiens | melanoma | 0.8808 |
| hsa-miR-219a-5p | miRNA | Homo sapiens | melanoma | 0.8808 |
| *hsa-miR-221-3p | miRNA | Homo sapiens | melanoma | 0.8808 |
| hsa-miR-15b-5p  | miRNA | Homo sapiens | melanoma | 0.8808 |
| hsa-miR-23b-3p  | miRNA | Homo sapiens | melanoma | 0.8808 |
| hsa-miR-30b-5p  | miRNA | Homo sapiens | melanoma | 0.8808 |
| hsa-miR-124-3p  | miRNA | Homo sapiens | melanoma | 0.8808 |
| hsa-miR-138-5p  | miRNA | Homo sapiens | melanoma | 0.8808 |
| hsa-miR-144-3p  | miRNA | Homo sapiens | melanoma | 0.8808 |
| hsa-miR-9-5p    | miRNA | Homo sapiens | melanoma | 0.8808 |

|                 |       |              |          |        |
|-----------------|-------|--------------|----------|--------|
| hsa-miR-149-5p  | miRNA | Homo sapiens | melanoma | 0.8808 |
| hsa-miR-154-5p  | miRNA | Homo sapiens | melanoma | 0.8808 |
| hsa-miR-184     | miRNA | Homo sapiens | melanoma | 0.8808 |
| hsa-miR-185-5p  | miRNA | Homo sapiens | melanoma | 0.8808 |
| hsa-miR-302a-3p | miRNA | Homo sapiens | melanoma | 0.8808 |
| hsa-miR-34b-5p  | miRNA | Homo sapiens | melanoma | 0.8808 |
| hsa-miR-302b-3p | miRNA | Homo sapiens | melanoma | 0.8808 |
| hsa-miR-302c-3p | miRNA | Homo sapiens | melanoma | 0.8808 |
| hsa-miR-302d-3p | miRNA | Homo sapiens | melanoma | 0.8808 |
| hsa-miR-374a-5p | miRNA | Homo sapiens | melanoma | 0.8808 |
| hsa-miR-323a-3p | miRNA | Homo sapiens | melanoma | 0.8808 |
| hsa-miR-135b-5p | miRNA | Homo sapiens | melanoma | 0.8808 |
| hsa-miR-331-3p  | miRNA | Homo sapiens | melanoma | 0.8808 |
| hsa-miR-325     | miRNA | Homo sapiens | melanoma | 0.8808 |
| hsa-miR-532-5p  | miRNA | Homo sapiens | melanoma | 0.8808 |
| hsa-miR-15a-3p  | miRNA | Homo sapiens | melanoma | 0.8808 |
| hsa-miR-15b-3p  | miRNA | Homo sapiens | melanoma | 0.8808 |
| hsa-mir-16-1    | miRNA | Homo sapiens | melanoma | 0.8589 |
| hsa-mir-19b-1   | miRNA | Homo sapiens | melanoma | 0.8589 |
| hsa-mir-29b-1   | miRNA | Homo sapiens | melanoma | 0.8589 |
| hsa-mir-29b-2   | miRNA | Homo sapiens | melanoma | 0.8589 |
| hsa-mir-103a-2  | miRNA | Homo sapiens | melanoma | 0.8589 |
| hsa-mir-16-2    | miRNA | Homo sapiens | melanoma | 0.8589 |
| hsa-mir-199a-2  | miRNA | Homo sapiens | melanoma | 0.8589 |

|                 |       |              |          |        |
|-----------------|-------|--------------|----------|--------|
| hsa-mir-181a-1  | miRNA | Homo sapiens | melanoma | 0.8589 |
| hsa-mir-215     | miRNA | Homo sapiens | melanoma | 0.8589 |
| hsa-mir-218-1   | miRNA | Homo sapiens | melanoma | 0.8589 |
| hsa-mir-133a-2  | miRNA | Homo sapiens | melanoma | 0.8589 |
| hsa-mir-138-2   | miRNA | Homo sapiens | melanoma | 0.8589 |
| hsa-mir-153-2   | miRNA | Homo sapiens | melanoma | 0.8589 |
| hsa-mir-9-1     | miRNA | Homo sapiens | melanoma | 0.8589 |
| hsa-mir-138-1   | miRNA | Homo sapiens | melanoma | 0.8589 |
| hsa-mir-194-1   | miRNA | Homo sapiens | melanoma | 0.8589 |
| hsa-mir-1-1     | miRNA | Homo sapiens | melanoma | 0.8589 |
| hsa-mir-106b    | miRNA | Homo sapiens | melanoma | 0.8589 |
| hsa-mir-383     | miRNA | Homo sapiens | melanoma | 0.8589 |
| hsa-mir-151a    | miRNA | Homo sapiens | melanoma | 0.8589 |
| hsa-miR-25-3p   | miRNA | Homo sapiens | melanoma | 0.8589 |
| hsa-miR-29a-3p  | miRNA | Homo sapiens | melanoma | 0.8589 |
| hsa-miR-93-5p   | miRNA | Homo sapiens | melanoma | 0.8589 |
| hsa-miR-30d-5p  | miRNA | Homo sapiens | melanoma | 0.8589 |
| hsa-miR-320a    | miRNA | Homo sapiens | melanoma | 0.8589 |
| hsa-miR-296-5p  | miRNA | Homo sapiens | melanoma | 0.8589 |
| hsa-miR-367-3p  | miRNA | Homo sapiens | melanoma | 0.8589 |
| hsa-miR-376c-3p | miRNA | Homo sapiens | melanoma | 0.8589 |
| hsa-miR-376a-3p | miRNA | Homo sapiens | melanoma | 0.8589 |
| hsa-miR-338-3p  | miRNA | Homo sapiens | melanoma | 0.8589 |
| hsa-miR-339-5p  | miRNA | Homo sapiens | melanoma | 0.8589 |

|                |       |              |          |        |
|----------------|-------|--------------|----------|--------|
| hsa-miR-488-5p | miRNA | Homo sapiens | melanoma | 0.8589 |
| hsa-miR-933    | miRNA | Homo sapiens | melanoma | 0.8589 |

---

\* denotes it exists in MNDR

**Supplementary table 2.** All putative mRNAs for miR-377-3p from miRDB database.

| Target Rank | Target Score | miRNA Name     | Gene Symbol | Gene Description                                                    |
|-------------|--------------|----------------|-------------|---------------------------------------------------------------------|
| 1           | 99           | hsa-miR-377-3p | STOX2       | storkhead box 2                                                     |
| 2           | 99           | hsa-miR-377-3p | ARMC8       | armadillo repeat containing 8                                       |
| 3           | 99           | hsa-miR-377-3p | NLGN1       | neuroligin 1                                                        |
| 4           | 99           | hsa-miR-377-3p | PUM2        | pumilio RNA binding family member 2                                 |
| 5           | 99           | hsa-miR-377-3p | ETS1        | ETS proto-oncogene 1, transcription factor                          |
| 6           | 99           | hsa-miR-377-3p | CFTR        | cystic fibrosis transmembrane conductance regulator                 |
| 7           | 98           | hsa-miR-377-3p | FBXO32      | F-box protein 32                                                    |
| 8           | 98           | hsa-miR-377-3p | JAG1        | jagged 1                                                            |
| 9           | 98           | hsa-miR-377-3p | SETBP1      | SET binding protein 1                                               |
| 10          | 98           | hsa-miR-377-3p | DCAF12      | DDB1 and CUL4 associated factor 12                                  |
| 11          | 97           | hsa-miR-377-3p | DCP1A       | decapping mRNA 1A                                                   |
| 12          | 97           | hsa-miR-377-3p | CUL1        | cullin 1                                                            |
| 13          | 97           | hsa-miR-377-3p | RNMT        | RNA guanine-7 methyltransferase                                     |
| 14          | 97           | hsa-miR-377-3p | C5orf24     | chromosome 5 open reading frame 24                                  |
| 15          | 97           | hsa-miR-377-3p | ATXN7       | ataxin 7                                                            |
| 16          | 97           | hsa-miR-377-3p | CNOT6       | CCR4-NOT transcription complex subunit 6                            |
| 17          | 97           | hsa-miR-377-3p | EIF4ENIF1   | eukaryotic translation initiation factor 4E nuclear import factor 1 |
| 18          | 97           | hsa-miR-377-3p | LIN28B      | lin-28 homolog B                                                    |
| 19          | 96           | hsa-miR-377-3p | SOD2        | superoxide dismutase 2                                              |
| 20          | 96           | hsa-miR-377-3p | CARTPT      | CART prepropeptide                                                  |
| 21          | 96           | hsa-miR-377-3p | C7orf57     | chromosome 7 open reading frame 57                                  |

|    |    |                |          |                                                       |
|----|----|----------------|----------|-------------------------------------------------------|
| 22 | 96 | hsa-miR-377-3p | SLC6A19  | solute carrier family 6 member 19                     |
| 23 | 96 | hsa-miR-377-3p | C21orf91 | chromosome 21 open reading frame 91                   |
| 24 | 96 | hsa-miR-377-3p | TMEM273  | transmembrane protein 273                             |
| 25 | 96 | hsa-miR-377-3p | HMOX1    | heme oxygenase 1                                      |
| 26 | 96 | hsa-miR-377-3p | FLVCR1   | feline leukemia virus subgroup C cellular receptor 1  |
| 27 | 96 | hsa-miR-377-3p | ANKRD42  | ankyrin repeat domain 42                              |
| 28 | 96 | hsa-miR-377-3p | MAT2B    | methionine adenosyltransferase 2B                     |
| 29 | 96 | hsa-miR-377-3p | OTULIN   | OTU deubiquitinase with linear linkage specificity    |
| 30 | 96 | hsa-miR-377-3p | ZZZ3     | zinc finger ZZ-type containing 3                      |
| 31 | 96 | hsa-miR-377-3p | DNAJB1   | DnaJ heat shock protein family (Hsp40) member B1      |
| 32 | 95 | hsa-miR-377-3p | NAA15    | N(alpha)-acetyltransferase 15, NatA auxiliary subunit |
| 33 | 95 | hsa-miR-377-3p | NTS      | neurotensin                                           |
| 34 | 95 | hsa-miR-377-3p | KIF13A   | kinesin family member 13A                             |
| 35 | 95 | hsa-miR-377-3p | CCNT2    | cyclin T2                                             |
| 36 | 95 | hsa-miR-377-3p | CELF1    | CUGBP Elav-like family member 1                       |
| 37 | 95 | hsa-miR-377-3p | PITX2    | paired like homeodomain 2                             |
| 38 | 95 | hsa-miR-377-3p | LMX1A    | LIM homeobox transcription factor 1 alpha             |
| 39 | 95 | hsa-miR-377-3p | UBE2H    | ubiquitin conjugating enzyme E2 H                     |
| 40 | 94 | hsa-miR-377-3p | C6orf106 | chromosome 6 open reading frame 106                   |
| 41 | 94 | hsa-miR-377-3p | CDON     | cell adhesion associated, oncogene regulated          |
| 42 | 94 | hsa-miR-377-3p | SGK3     | serum/glucocorticoid regulated kinase family member 3 |
| 43 | 94 | hsa-miR-377-3p | SPTLC1   | serine palmitoyltransferase long chain base subunit 1 |
| 44 | 94 | hsa-miR-377-3p | FNBP1L   | formin binding protein 1 like                         |
| 45 | 94 | hsa-miR-377-3p | LRPAP1   | LDL receptor related protein associated protein 1     |



|    |    |                |         |                                                      |
|----|----|----------------|---------|------------------------------------------------------|
| 46 | 94 | hsa-miR-377-3p | FOXJ3   | forkhead box J3                                      |
| 47 | 94 | hsa-miR-377-3p | PCDH10  | protocadherin 10                                     |
| 48 | 94 | hsa-miR-377-3p | STARD7  | StAR related lipid transfer domain containing 7      |
| 49 | 94 | hsa-miR-377-3p | UNC80   | unc-80 homolog, NALCN channel complex subunit        |
| 50 | 93 | hsa-miR-377-3p | SYT11   | synaptotagmin 11                                     |
| 51 | 93 | hsa-miR-377-3p | RPS6KB1 | ribosomal protein S6 kinase B1                       |
| 52 | 93 | hsa-miR-377-3p | IL18R1  | interleukin 18 receptor 1                            |
| 53 | 93 | hsa-miR-377-3p | ULK1    | unc-51 like autophagy activating kinase 1            |
| 54 | 93 | hsa-miR-377-3p | TAPT1   | transmembrane anterior posterior transformation 1    |
| 55 | 93 | hsa-miR-377-3p | NRXN1   | neurexin 1                                           |
| 56 | 93 | hsa-miR-377-3p | NELFA   | negative elongation factor complex member A          |
| 57 | 93 | hsa-miR-377-3p | KLHL24  | kelch like family member 24                          |
| 58 | 93 | hsa-miR-377-3p | UBE2D2  | ubiquitin conjugating enzyme E2 D2                   |
| 59 | 93 | hsa-miR-377-3p | RASSF8  | Ras association domain family member 8               |
| 60 | 93 | hsa-miR-377-3p | CHUK    | conserved helix-loop-helix ubiquitous kinase         |
| 61 | 92 | hsa-miR-377-3p | SMIM3   | small integral membrane protein 3                    |
| 62 | 92 | hsa-miR-377-3p | NRP2    | neuropilin 2                                         |
| 63 | 92 | hsa-miR-377-3p | MCF2    | MCF.2 cell line derived transforming sequence        |
| 64 | 92 | hsa-miR-377-3p | ZFP36L1 | ZFP36 ring finger protein like 1                     |
| 65 | 92 | hsa-miR-377-3p | NR6A1   | nuclear receptor subfamily 6 group A member 1        |
| 66 | 92 | hsa-miR-377-3p | ATL2    | atlastin GTPase 2                                    |
| 67 | 92 | hsa-miR-377-3p | KCNA4   | potassium voltage-gated channel subfamily A member 4 |
| 68 | 92 | hsa-miR-377-3p | ARID4B  | AT-rich interaction domain 4B                        |
| 69 | 92 | hsa-miR-377-3p | KLF7    | Kruppel like factor 7                                |

|    |    |                |          |                                                         |
|----|----|----------------|----------|---------------------------------------------------------|
| 70 | 92 | hsa-miR-377-3p | PPP3R1   | protein phosphatase 3 regulatory subunit B, alpha       |
| 71 | 92 | hsa-miR-377-3p | INPP5E   | inositol polyphosphate-5-phosphatase E                  |
| 72 | 92 | hsa-miR-377-3p | RBM33    | RNA binding motif protein 33                            |
| 73 | 92 | hsa-miR-377-3p | DNAJB9   | DnaJ heat shock protein family (Hsp40) member B9        |
| 74 | 91 | hsa-miR-377-3p | OCRL     | OCRL, inositol polyphosphate-5-phosphatase              |
| 75 | 91 | hsa-miR-377-3p | EFCAB1   | EF-hand calcium binding domain 1                        |
| 76 | 91 | hsa-miR-377-3p | LAMC1    | laminin subunit gamma 1                                 |
| 77 | 91 | hsa-miR-377-3p | INSC     | INSC, spindle orientation adaptor protein               |
| 78 | 91 | hsa-miR-377-3p | KCNMA1   | potassium calcium-activated channel subfamily M alpha 1 |
| 79 | 91 | hsa-miR-377-3p | ARL8B    | ADP ribosylation factor like GTPase 8B                  |
| 80 | 91 | hsa-miR-377-3p | CSRNP3   | cysteine and serine rich nuclear protein 3              |
| 81 | 91 | hsa-miR-377-3p | CARF     | calcium responsive transcription factor                 |
| 82 | 91 | hsa-miR-377-3p | OCN      | occludin                                                |
| 83 | 91 | hsa-miR-377-3p | RABGAP1L | RAB GTPase activating protein 1 like                    |
| 84 | 91 | hsa-miR-377-3p | GXYLT2   | glucoside xylosyltransferase 2                          |
| 85 | 91 | hsa-miR-377-3p | GLS      | glutaminase                                             |
| 86 | 91 | hsa-miR-377-3p | CREBL2   | cAMP responsive element binding protein like 2          |
| 87 | 91 | hsa-miR-377-3p | FBXO4    | F-box protein 4                                         |
| 88 | 91 | hsa-miR-377-3p | UMAD1    | UBAP1-MVB12-associated (UMA) domain containing 1        |
| 89 | 91 | hsa-miR-377-3p | MINAR1   | membrane integral NOTCH2 associated receptor 1          |
| 90 | 91 | hsa-miR-377-3p | RBMS1    | RNA binding motif single stranded interacting protein 1 |
| 91 | 91 | hsa-miR-377-3p | TM6SF1   | transmembrane 6 superfamily member 1                    |
| 92 | 90 | hsa-miR-377-3p | CEP135   | centrosomal protein 135                                 |
| 93 | 90 | hsa-miR-377-3p | PHF6     | PHD finger protein 6                                    |

|     |    |                |          |                                                                      |
|-----|----|----------------|----------|----------------------------------------------------------------------|
| 94  | 90 | hsa-miR-377-3p | ARHGAP5  | Rho GTPase activating protein 5                                      |
| 95  | 90 | hsa-miR-377-3p | NT5C3B   | 5'-nucleotidase, cytosolic IIIB                                      |
| 96  | 90 | hsa-miR-377-3p | SCN8A    | sodium voltage-gated channel alpha subunit 8                         |
| 97  | 90 | hsa-miR-377-3p | TASOR    | transcription activation suppressor                                  |
| 98  | 90 | hsa-miR-377-3p | PTPRT    | protein tyrosine phosphatase, receptor type T                        |
| 99  | 90 | hsa-miR-377-3p | PCF11    | PCF11, cleavage and polyadenylation factor subunit                   |
| 100 | 90 | hsa-miR-377-3p | XIAP     | X-linked inhibitor of apoptosis                                      |
| 101 | 90 | hsa-miR-377-3p | CCDC68   | coiled-coil domain containing 68                                     |
| 102 | 90 | hsa-miR-377-3p | NRF1     | nuclear respiratory factor 1                                         |
| 103 | 90 | hsa-miR-377-3p | ARID1A   | AT-rich interaction domain 1A                                        |
| 104 | 90 | hsa-miR-377-3p | VDAC3    | voltage dependent anion channel 3                                    |
| 105 | 90 | hsa-miR-377-3p | ARHGEF28 | Rho guanine nucleotide exchange factor 28                            |
| 106 | 90 | hsa-miR-377-3p | TRIP12   | thyroid hormone receptor interactor 12                               |
| 107 | 90 | hsa-miR-377-3p | XPO7     | exportin 7                                                           |
| 108 | 90 | hsa-miR-377-3p | FLYWCH2  | FLYWCH family member 2                                               |
| 109 | 89 | hsa-miR-377-3p | PDE10A   | phosphodiesterase 10A                                                |
| 110 | 89 | hsa-miR-377-3p | PPM1A    | protein phosphatase, Mg <sup>2+</sup> /Mn <sup>2+</sup> dependent 1A |
| 111 | 89 | hsa-miR-377-3p | PLCB1    | phospholipase C beta 1                                               |
| 112 | 89 | hsa-miR-377-3p | GPCPD1   | glycerophosphocholine phosphodiesterase 1                            |
| 113 | 89 | hsa-miR-377-3p | CACNA2D1 | calcium voltage-gated channel auxiliary subunit alpha2delta 1        |
| 114 | 89 | hsa-miR-377-3p | TAF4     | TATA-box binding protein associated factor 4                         |
| 115 | 89 | hsa-miR-377-3p | CDH13    | cadherin 13                                                          |
| 116 | 89 | hsa-miR-377-3p | TTLL7    | tubulin tyrosine ligase like 7                                       |
| 117 | 88 | hsa-miR-377-3p | EYA4     | EYA transcriptional coactivator and phosphatase 4                    |

|     |    |                |          |       |                                                     |
|-----|----|----------------|----------|-------|-----------------------------------------------------|
| 118 | 88 | hsa-miR-377-3p | GBP1     |       | guanylate binding protein 1                         |
| 119 | 88 | hsa-miR-377-3p | RNF38    |       | ring finger protein 38                              |
| 120 | 88 | hsa-miR-377-3p | SLC39A10 |       | solute carrier family 39 member 10                  |
| 121 | 88 | hsa-miR-377-3p |          | 43710 | septin 2                                            |
| 122 | 88 | hsa-miR-377-3p | NUFIP2   |       | nuclear FMR1 interacting protein 2                  |
| 123 | 88 | hsa-miR-377-3p | USP13    |       | ubiquitin specific peptidase 13                     |
| 124 | 88 | hsa-miR-377-3p | WASF1    |       | WAS protein family member 1                         |
| 125 | 88 | hsa-miR-377-3p | DARS2    |       | aspartyl-tRNA synthetase 2, mitochondrial           |
| 126 | 88 | hsa-miR-377-3p | RSBN1    |       | round spermatid basic protein 1                     |
| 127 | 87 | hsa-miR-377-3p | HS3ST5   |       | heparan sulfate-glucosamine 3-sulfotransferase 5    |
| 128 | 87 | hsa-miR-377-3p | SLC4A10  |       | solute carrier family 4 member 10                   |
| 129 | 87 | hsa-miR-377-3p | ZNF148   |       | zinc finger protein 148                             |
| 130 | 87 | hsa-miR-377-3p | CRELD1   |       | cysteine rich with EGF like domains 1               |
| 131 | 87 | hsa-miR-377-3p | ABHD18   |       | abhydrolase domain containing 18                    |
| 132 | 87 | hsa-miR-377-3p | CDC14A   |       | cell division cycle 14A                             |
| 133 | 87 | hsa-miR-377-3p | NT5E     |       | 5'-nucleotidase ecto                                |
| 134 | 87 | hsa-miR-377-3p | UBXN10   |       | UBX domain protein 10                               |
| 135 | 87 | hsa-miR-377-3p | RIN2     |       | Ras and Rab interactor 2                            |
| 136 | 87 | hsa-miR-377-3p | NCOA1    |       | nuclear receptor coactivator 1                      |
| 137 | 87 | hsa-miR-377-3p | CAND1    |       | cullin associated and neddylation dissociated 1     |
| 138 | 87 | hsa-miR-377-3p | GPR88    |       | G protein-coupled receptor 88                       |
| 139 | 87 | hsa-miR-377-3p | CAPZB    |       | capping actin protein of muscle Z-line subunit beta |
| 140 | 87 | hsa-miR-377-3p | RALGPS2  |       | Ral GEF with PH domain and SH3 binding motif 2      |
| 141 | 87 | hsa-miR-377-3p | GREM2    |       | gremlin 2, DAN family BMP antagonist                |

|     |    |                |              |                                                           |
|-----|----|----------------|--------------|-----------------------------------------------------------|
| 142 | 87 | hsa-miR-377-3p | CENPV        | centromere protein V                                      |
| 143 | 87 | hsa-miR-377-3p | MSR1         | macrophage scavenger receptor 1                           |
| 144 | 86 | hsa-miR-377-3p | ZCCHC17      | zinc finger CCHC-type containing 17                       |
| 145 | 86 | hsa-miR-377-3p | KRTAP19-3    | keratin associated protein 19-3                           |
| 146 | 86 | hsa-miR-377-3p | MED13L       | mediator complex subunit 13 like                          |
| 147 | 86 | hsa-miR-377-3p | SRSF1        | serine and arginine rich splicing factor 1                |
| 148 | 86 | hsa-miR-377-3p | RBM18        | RNA binding motif protein 18                              |
| 149 | 86 | hsa-miR-377-3p | ZBTB6        | zinc finger and BTB domain containing 6                   |
| 150 | 86 | hsa-miR-377-3p | CDV3         | CDV3 homolog                                              |
| 151 | 86 | hsa-miR-377-3p | KAT6A        | lysine acetyltransferase 6A                               |
| 152 | 86 | hsa-miR-377-3p | ZNF516       | zinc finger protein 516                                   |
| 153 | 86 | hsa-miR-377-3p | PTGS1        | prostaglandin-endoperoxide synthase 1                     |
| 154 | 86 | hsa-miR-377-3p | BCL2L1       | BCL2 like 1                                               |
| 155 | 86 | hsa-miR-377-3p | CCDC117      | coiled-coil domain containing 117                         |
| 156 | 86 | hsa-miR-377-3p | TRIO         | trio Rho guanine nucleotide exchange factor               |
| 157 | 85 | hsa-miR-377-3p | SLC11A2      | solute carrier family 11 member 2                         |
| 158 | 85 | hsa-miR-377-3p | C8orf44-SGK3 | C8orf44-SGK3 readthrough                                  |
| 159 | 85 | hsa-miR-377-3p | TMX1         | thioredoxin related transmembrane protein 1               |
| 160 | 85 | hsa-miR-377-3p | AGAP5        | ArfGAP with GTPase domain, ankyrin repeat and PH domain 5 |
| 161 | 85 | hsa-miR-377-3p | AGAP6        | ArfGAP with GTPase domain, ankyrin repeat and PH domain 6 |
| 162 | 85 | hsa-miR-377-3p | PEX14        | peroxisomal biogenesis factor 14                          |
| 163 | 85 | hsa-miR-377-3p | SESN1        | sestrin 1                                                 |
| 164 | 85 | hsa-miR-377-3p | STK35        | serine/threonine kinase 35                                |

|     |    |                |              |                                                           |
|-----|----|----------------|--------------|-----------------------------------------------------------|
| 165 | 85 | hsa-miR-377-3p | FBXO30       | F-box protein 30                                          |
| 166 | 85 | hsa-miR-377-3p | SLC6A8       | solute carrier family 6 member 8                          |
| 167 | 85 | hsa-miR-377-3p | AGAP4        | ArfGAP with GTPase domain, ankyrin repeat and PH domain 4 |
| 168 | 84 | hsa-miR-377-3p | IDS          | iduronate 2-sulfatase                                     |
| 169 | 84 | hsa-miR-377-3p | AAK1         | AP2 associated kinase 1                                   |
| 170 | 84 | hsa-miR-377-3p | KCTD2        | potassium channel tetramerization domain containing 2     |
| 171 | 84 | hsa-miR-377-3p | CAMTA1       | calmodulin binding transcription activator 1              |
| 172 | 84 | hsa-miR-377-3p | PLPPR5       | phospholipid phosphatase related 5                        |
| 173 | 84 | hsa-miR-377-3p | LIG4         | DNA ligase 4                                              |
| 174 | 84 | hsa-miR-377-3p | TP63         | tumor protein p63                                         |
| 175 | 84 | hsa-miR-377-3p | TUBE1        | tubulin epsilon 1                                         |
| 176 | 84 | hsa-miR-377-3p | CD274        | CD274 molecule                                            |
| 177 | 84 | hsa-miR-377-3p | FZD6         | frizzled class receptor 6                                 |
| 178 | 84 | hsa-miR-377-3p | UBA3         | ubiquitin like modifier activating enzyme 3               |
| 179 | 83 | hsa-miR-377-3p | CTSC         | cathepsin C                                               |
| 180 | 83 | hsa-miR-377-3p | POC1B-GALNT4 | POC1B-GALNT4 readthrough                                  |
| 181 | 83 | hsa-miR-377-3p | RB1          | RB transcriptional corepressor 1                          |
| 182 | 83 | hsa-miR-377-3p | DNAJC6       | DnaJ heat shock protein family (Hsp40) member C6          |
| 183 | 83 | hsa-miR-377-3p | CDKN1B       | cyclin dependent kinase inhibitor 1B                      |
| 184 | 83 | hsa-miR-377-3p | GALNT4       | polypeptide N-acetylgalactosaminyltransferase 4           |
| 185 | 83 | hsa-miR-377-3p | PSME4        | proteasome activator subunit 4                            |
| 186 | 83 | hsa-miR-377-3p | IL1RN        | interleukin 1 receptor antagonist                         |
| 187 | 83 | hsa-miR-377-3p | ERGIC1       | endoplasmic reticulum-golgi intermediate compartment 1    |
| 188 | 83 | hsa-miR-377-3p | PAQR3        | progesterin and adipoQ receptor family member 3           |

|     |    |                |          |                                                    |
|-----|----|----------------|----------|----------------------------------------------------|
| 189 | 83 | hsa-miR-377-3p | XRCC4    | X-ray repair cross complementing 4                 |
| 190 | 83 | hsa-miR-377-3p | IRX3     | iroquois homeobox 3                                |
| 191 | 83 | hsa-miR-377-3p | FBXO33   | F-box protein 33                                   |
| 192 | 83 | hsa-miR-377-3p | C16orf72 | chromosome 16 open reading frame 72                |
| 193 | 83 | hsa-miR-377-3p | ENPP6    | ectonucleotide pyrophosphatase/phosphodiesterase 6 |
| 194 | 83 | hsa-miR-377-3p | PPP1R9A  | protein phosphatase 1 regulatory subunit 9A        |
| 195 | 83 | hsa-miR-377-3p | HTR7     | 5-hydroxytryptamine receptor 7                     |
| 196 | 83 | hsa-miR-377-3p | OSBPL8   | oxysterol binding protein like 8                   |
| 197 | 83 | hsa-miR-377-3p | INO80D   | INO80 complex subunit D                            |
| 198 | 83 | hsa-miR-377-3p | GRSF1    | G-rich RNA sequence binding factor 1               |
| 199 | 82 | hsa-miR-377-3p | C2       | complement C2                                      |
| 200 | 82 | hsa-miR-377-3p | SEMA6A   | semaphorin 6A                                      |
| 201 | 82 | hsa-miR-377-3p | PTPRB    | protein tyrosine phosphatase, receptor type B      |
| 202 | 82 | hsa-miR-377-3p | SVIP     | small VCP interacting protein                      |
| 203 | 82 | hsa-miR-377-3p | MAP3K7   | mitogen-activated protein kinase kinase kinase 7   |
| 204 | 82 | hsa-miR-377-3p | RFC1     | replication factor C subunit 1                     |
| 205 | 82 | hsa-miR-377-3p | NETO1    | neuropilin and tolloid like 1                      |
| 206 | 82 | hsa-miR-377-3p | DDX31    | DEAD-box helicase 31                               |
| 207 | 82 | hsa-miR-377-3p | USP49    | ubiquitin specific peptidase 49                    |
| 208 | 82 | hsa-miR-377-3p | TMOD2    | tropomodulin 2                                     |
| 209 | 82 | hsa-miR-377-3p | MGAM     | maltase-glucoamylase                               |
| 210 | 82 | hsa-miR-377-3p | SLC4A7   | solute carrier family 4 member 7                   |
| 211 | 82 | hsa-miR-377-3p | NKRF     | NFKB repressing factor                             |
| 212 | 82 | hsa-miR-377-3p | NXPH3    | neurexophilin 3                                    |

|     |    |                |          |       |                                                    |
|-----|----|----------------|----------|-------|----------------------------------------------------|
| 213 | 82 | hsa-miR-377-3p | MAP1A    |       | microtubule associated protein 1A                  |
| 214 | 82 | hsa-miR-377-3p | GRM6     |       | glutamate metabotropic receptor 6                  |
| 215 | 82 | hsa-miR-377-3p | XPOT     |       | exportin for tRNA                                  |
| 216 | 81 | hsa-miR-377-3p | CASK     |       | calcium/calmodulin dependent serine protein kinase |
| 217 | 81 | hsa-miR-377-3p | IRX2     |       | iroquois homeobox 2                                |
| 218 | 81 | hsa-miR-377-3p | QKI      |       | QKI, KH domain containing RNA binding              |
| 219 | 81 | hsa-miR-377-3p | NAP1L1   |       | nucleosome assembly protein 1 like 1               |
| 220 | 81 | hsa-miR-377-3p | HDAC2    |       | histone deacetylase 2                              |
| 221 | 81 | hsa-miR-377-3p | NUP153   |       | nucleoporin 153                                    |
| 222 | 81 | hsa-miR-377-3p | SGCB     |       | sarcoglycan beta                                   |
| 223 | 81 | hsa-miR-377-3p | TMED2    |       | transmembrane p24 trafficking protein 2            |
| 224 | 81 | hsa-miR-377-3p | BEND3    |       | BEN domain containing 3                            |
| 225 | 81 | hsa-miR-377-3p | STRN4    |       | striatin 4                                         |
| 226 | 81 | hsa-miR-377-3p | ETNK1    |       | ethanolamine kinase 1                              |
| 227 | 81 | hsa-miR-377-3p |          | 43527 | membrane associated ring-CH-type finger 3          |
| 228 | 81 | hsa-miR-377-3p | SNX16    |       | sorting nexin 16                                   |
| 229 | 81 | hsa-miR-377-3p | PCDH7    |       | protocadherin 7                                    |
| 230 | 81 | hsa-miR-377-3p | H3F3A    |       | H3 histone family member 3A                        |
| 231 | 81 | hsa-miR-377-3p | RNF182   |       | ring finger protein 182                            |
| 232 | 81 | hsa-miR-377-3p | IPO5     |       | importin 5                                         |
| 233 | 81 | hsa-miR-377-3p | ALKAL1   |       | ALK and LTK ligand 1                               |
| 234 | 81 | hsa-miR-377-3p | GPATCH2L |       | G-patch domain containing 2 like                   |
| 235 | 80 | hsa-miR-377-3p | SYCP2L   |       | synaptonemal complex protein 2 like                |
| 236 | 80 | hsa-miR-377-3p | THSD4    |       | thrombospondin type 1 domain containing 4          |



|     |    |                |          |                                                                     |
|-----|----|----------------|----------|---------------------------------------------------------------------|
| 237 | 80 | hsa-miR-377-3p | PAFAH1B1 | platelet activating factor acetylhydrolase 1b regulatory subunit 1  |
| 238 | 80 | hsa-miR-377-3p | HP1BP3   | heterochromatin protein 1 binding protein 3                         |
| 239 | 80 | hsa-miR-377-3p | OSBP2    | oxysterol binding protein 2                                         |
| 240 | 80 | hsa-miR-377-3p | BTG3     | BTG anti-proliferation factor 3                                     |
| 241 | 80 | hsa-miR-377-3p | B4GALT6  | beta-1,4-galactosyltransferase 6                                    |
| 242 | 80 | hsa-miR-377-3p | MCU      | mitochondrial calcium uniporter                                     |
| 243 | 80 | hsa-miR-377-3p | SEMA3E   | semaphorin 3E                                                       |
| 244 | 80 | hsa-miR-377-3p | RIF1     | replication timing regulatory factor 1                              |
| 245 | 80 | hsa-miR-377-3p | NOS3     | nitric oxide synthase 3                                             |
| 246 | 80 | hsa-miR-377-3p | PLCXD3   | phosphatidylinositol specific phospholipase C X domain containing 3 |
| 247 | 80 | hsa-miR-377-3p | NEGR1    | neuronal growth regulator 1                                         |
| 248 | 80 | hsa-miR-377-3p | TACR1    | tachykinin receptor 1                                               |
| 249 | 80 | hsa-miR-377-3p | PCGF5    | polycomb group ring finger 5                                        |
| 250 | 80 | hsa-miR-377-3p | COLQ     | collagen like tail subunit of asymmetric acetylcholinesterase       |
| 251 | 80 | hsa-miR-377-3p | UBP1     | upstream binding protein 1                                          |

---
